# Supplementary material for: Fetal Sex-Dependent Associations Between Gestational Hormone Concentrations and Adverse Birth Outcomes
Source: Research Square preprint supplement (doi:10.21203/rs.3.rs-151002/v1), 2021-01-26
Supplement: Supplementary file 1 [file 785224f0c69d9c3e10311dab.docx]

Supplementary Information

Article Title: Fetal Sex-Dependent Associations Between Gestational Hormone Concentrations and Adverse Birth Outcomes

Amber L. Cathey1, Deborah J Watkins1, Zaira Y. Rosario2, Carmen M. Vélez Vega2, Bhramar Mukherjee3, Marie S. O’Neill1,4, Rita Loch-Caruso1, Akram N. Alshawabkeh5, José F. Cordero6, John D. Meeker1*

| **Supplementary Table S1. Distributions of gestational average (GA) and visit specific hormone concentrations** | | | | | | | | | | | | | | |
| --- | --- | --- | --- | --- | --- | --- | --- | --- | --- | --- | --- | --- | --- | --- |
|  |  | **N** | **min** | **25th** | **50th** | **75th** | **90th** | **95th** | **Max** | **Geo. Mean** | **Geo. Stdv** | **IQR** | **Visit P-value*** | **ICC (95% CI)** |
| **CRH (pg/mL)** | GA | 976 | 3.50 | 15.4 | 43.2 | 86.3 | 118 | 148 | 243 | 35.7 | 2.77 | 70.9 | 0.914 | 0.71 (0.66, 0.74) |
| 18wks | 818 | 3.50 | 15.1 | 37.6 | 84.3 | 121 | 156 | 254 | 34.4 | 2.89 | 69.2 |  |  |
| 26wks | 602 | 3.50 | 14.7 | 39.3 | 88.2 | 130 | 159 | 249 | 34.2 | 2.95 | 73.4 |  |  |
| **Estriol (mg/mL)** | GA | 971 | 0.74 | 15.6 | 23.1 | 33.0 | 44.7 | 57.5 | 265 | 22.7 | 1.80 | 17.4 | 0.000 | -0.22 (-0.35, -0.11) |
| 18wks | 812 | 0.74 | 11.3 | 15.1 | 22.2 | 31.8 | 41.5 | 108 | 15.8 | 1.75 | 10.9 |  |  |
| 26wks | 600 | 6.90 | 29.3 | 38.2 | 50.5 | 64.4 | 74.6 | 265 | 38.7 | 1.55 | 21.2 |  |  |
| **SHBG (pg/mL)** | GA | 976 | 47.6 | 413 | 538 | 668 | 818 | 895 | 1404 | 522 | 1.45 | 254 | 0.000 | 0.76 (0.72, 0.79) |
| 18wks | 820 | 47.6 | 389 | 516 | 630 | 775 | 850 | 1461 | 491 | 1.47 | 241 |  |  |
| 26wks | 602 | 123 | 434 | 566 | 723 | 898 | 979 | 1428 | 558 | 1.45 | 289 |  |  |
| **Prog. (ng/mL)** | GA | 973 | 10.1 | 36.6 | 50.4 | 71.0 | 99.4 | 124 | 1037 | 51.8 | 1.68 | 34.5 | 0.000 | 0.07 (-0.04, 0.17) |
| 18wks | 815 | 10.1 | 29.2 | 39.3 | 54.5 | 71.9 | 85.0 | 301 | 40.1 | 1.59 | 25.3 |  |  |
| 26wks | 601 | 19.4 | 51.2 | 73.5 | 104 | 146 | 179 | 1037 | 74.4 | 1.70 | 53.2 |  |  |
| **TSH (uIU/mL)** | GA | 971 | 0.03 | 0.71 | 1.10 | 1.72 | 2.38 | 2.99 | 32.4 | 1.08 | 1.96 | 1.02 | 0.031 | 0.72 (0.67, 0.75) |
| 18wks | 812 | 0.02 | 0.67 | 1.05 | 1.66 | 2.38 | 2.88 | 40.9 | 1.03 | 2.06 | 0.99 |  |  |
| 26wks | 600 | 0.11 | 0.72 | 1.15 | 1.75 | 2.43 | 3.23 | 25.7 | 1.12 | 1.96 | 1.03 |  |  |
| **fT4 (ng/dL)** | GA | 976 | 0.11 | 1.09 | 1.62 | 2.02 | 2.32 | 2.50 | 8.35 | 1.41 | 1.68 | 0.93 | 0.452 | 0.75 (0.71, 0.79) |
| 18wks | 818 | 0.11 | 1.03 | 1.57 | 2.01 | 2.30 | 2.48 | 8.35 | 1.34 | 1.84 | 0.98 |  |  |
| 26wks | 602 | 0.11 | 1.10 | 1.61 | 2.03 | 2.33 | 2.49 | 4.68 | 1.39 | 1.75 | 0.93 |  |  |
| **T4 (ug/dL)** | GA | 975 | 0.35 | 0.89 | 1.00 | 1.10 | 1.21 | 1.28 | 1.72 | 0.99 | 1.19 | 0.21 | 0.000 | 0.65 (0.59, 0.69) |
| 18wks | 818 | 0.35 | 0.90 | 1.01 | 1.12 | 1.21 | 1.28 | 1.72 | 1.00 | 1.19 | 0.22 |  |  |
| 26wks | 602 | 0.44 | 0.83 | 0.96 | 1.08 | 1.19 | 1.23 | 1.43 | 0.94 | 1.21 | 0.25 |  |  |
| **T3 (mg/mL)** | GA | 971 | 6.20 | 10.5 | 11.8 | 13.2 | 14.4 | 15.2 | 19.0 | 11.7 | 1.18 | 2.70 | 0.008 | 0.72 (0.67, 0.75) |
| 18wks | 812 | 6.80 | 10.6 | 11.9 | 13.3 | 14.4 | 15.3 | 19.0 | 11.8 | 1.19 | 2.70 |  |  |
| 26wks | 600 | 5.30 | 10.3 | 11.6 | 13.0 | 14.2 | 14.9 | 20.6 | 11.5 | 1.19 | 2.75 |  |  |
| **Test. (pg/mL)** | GA | 973 | 2.80 | 53.0 | 107 | 557 | 819 | 992 | 2868 | 160 | 3.55 | 504 | 0.012 | 0.86 (0.83, 0.88) |
| 18wks | 815 | 1.10 | 50.1 | 105 | 544 | 789 | 952 | 2500 | 156 | 3.66 | 493 |  |  |
| 26wks | 601 | 9.20 | 59.3 | 121 | 650 | 933 | 1092 | 3291 | 185 | 3.64 | 591 |  |  |
| *P-value from a univariate linear model for association between hormone concentrations and study visit.  Gestational average values were calculated as arithmetic means for normally distributed hormones and geometric means for log-normally distributed hormones. | | | | | | | | | | | | | | |

| **Supplementary Table S2. Associations between birth outcomes and hormones measured at 18 and 26 weeks’ gestation.** | | | | | | |
| --- | --- | --- | --- | --- | --- | --- |
|  | **Preterm Birth** | | | **Spontaneous Preterm Birth** | | |
|  | **18 weeks** | **Int P** | **26 weeks** | **18 weeks** | **Int P** | **26 weeks** |
|  | **OR (95% CI)** | **OR (95% CI)** | **OR (95% CI)** | **OR (95% CI)** |
| **CRH** | 1.16 (0.79, 1.72) | 0.800 | 1.08 (0.69, 1.69) | 1.50 (0.91, 2.49) | 0.443 | 1.10 (0.59, 2.04) |
| **Estriol** | 1.28 (0.85, 1.93) | 0.241 | 0.81 (0.42, 1.56) | 1.48 (0.89, 2.46) | 0.804 | 1.67 (0.74, 3.75) |
| **SHBG** | 0.98 (0.72, 1.34) | 0.561 | 0.85 (0.59, 1.23) | 1.16 (0.77, 1.74) | 0.970 | 1.15 (0.68, 1.92) |
| **Progesterone** | 1.36 (0.88, 2.11) | 0.689 | 1.20 (0.81, 1.79) | 1.40 (0.81, 2.41) | 0.269 | 2.12 (1.29, 3.47) |
| **TSH** | 1.03 (0.71, 1.48) | 0.250 | 1.40 (0.97, 2.02) | 0.86 (0.55, 1.34) | 0.437 | 1.14 (0.66, 1.96) |
| **T3** | 1.00 (0.68, 1.47) | 0.519 | 1.21 (0.79, 1.85) | 1.30 (0.80, 2.11) | 0.679 | 1.51 (0.91, 2.49) |
| **fT4** | 1.36 (0.98, 1.89) | 0.855 | 1.30 (0.88, 1.92) | 1.60 (1.07, 2.39) | 0.810 | 1.73 (1.04, 2.86) |
| **T4** | 1.31 (0.91, 1.87) | 0.964 | 1.29 (0.86, 1.93) | 1.26 (0.80, 2.00) | 1.000 | 1.26 (0.76, 2.11) |
| **Testosterone** | 0.92 (0.57, 1.49) | 0.872 | 0.98 (0.54, 1.78) | 0.59 (0.32, 1.10) | 0.772 | 0.68 (0.30, 1.54) |
| **T3/T4** | 0.91 (0.64, 1.31) | 0.711 | 1.01 (0.70, 1.45) | 1.17 (0.75, 1.83) | 0.780 | 1.28 (0.83, 1.97) |
| **Prog/E3** | 0.99 (0.75, 1.31) | 0.243 | 1.32 (0.89, 1.97) | 0.86 (0.60, 1.23) | 0.026 | 1.63 (1.05, 2.54) |
|  | **Gestational Age at Birth (weeks)** | | | **Birthweight Z-Score** | | |
|  | **18 weeks** | **Int P** | **26 weeks** | **18 weeks** | **Int P** | **26 weeks** |
|  | **β (95% CI)** | **β (95% CI)** | **β (95% CI)** | **β (95% CI)** |
| **CRH** | -0.26 (-0.56, 0.03) | 0.702 | -0.19 (-0.44, 0.06) | -0.02 (-0.15, 0.11) | 0.783 | 0.00 (-0.14, 0.14) |
| **Estriol** | -0.06 (-0.37, 0.25) | 0.113 | 0.42 (-0.09, 0.93) | 0.08 (-0.05, 0.21) | 0.292 | 0.21 (0.01, 0.41) |
| **SHBG** | 0.00 (-0.26, 0.25) | 0.512 | -0.12 (-0.37, 0.13) | 0.04 (-0.06, 0.14) | 0.341 | -0.04 (-0.16, 0.08) |
| **Progesterone** | -0.51 (-0.86,-0.16) | 0.044 | -0.08 (-0.31, 0.15) | -0.12 (-0.24, 0.01) | 0.201 | 0.00 (-0.13, 0.12) |
| **TSH** | 0.10 (-0.22, 0.41) | 0.323 | -0.10 (-0.35, 0.14) | 0.00 (-0.12, 0.12) | 0.939 | -0.01 (-0.14, 0.13) |
| **T3** | -0.22 (-0.54, 0.09) | 0.302 | 0.00 (-0.28, 0.28) | -0.01 (-0.12, 0.10) | 0.641 | 0.03 (-0.10, 0.16) |
| **fT4** | -0.32 (-0.55 -0.09) | 0.278 | -0.13 (-0.37, 0.11) | -0.07 (-0.18, 0.03) | 0.638 | -0.04 (-0.15, 0.08) |
| **T4** | -0.27 (-0.52 -0.02) | 0.577 | -0.17 (-0.39, 0.04) | -0.08 (-0.19, 0.04) | 0.744 | -0.10 (-0.22, 0.01) |
| **Testosterone** | 0.05 (-0.30, 0.40) | 0.895 | 0.08 (-0.31, 0.47) | 0.08 (-0.08, 0.24) | 0.306 | -0.04 (-0.22, 0.14) |
| **T3/T4** | -0.10 (-0.40, 0.19) | 0.269 | 0.11 (-0.12, 0.34) | 0.00 (-0.11, 0.11) | 0.448 | 0.07 (-0.06, 0.19) |
| **Prog/E3** | -0.25 (-0.48,-0.03) | 0.856 | -0.28 (-0.51,-0.05) | -0.12 (-0.23,-0.02) | 0.985 | -0.12 (-0.25, 0.00) |
|  | **Small for Gestational Age** | | | **Large for Gestational Age** | | |
|  | **18 weeks** | **Int P** | **26 weeks** | **18 weeks** | **Int P** | **26 weeks** |
|  | **OR (95% CI)** | **OR (95% CI)** | **OR (95% CI)** | **OR (95% CI)** |
| **CRH** | 0.87 (0.57, 1.32) | 0.232 | 1.23 (0.83, 1.83) | 0.82 (0.55, 1.23) | 0.602 | 0.97 (0.60, 1.55) |
| **Estriol** | 0.66 (0.45, 0.97) | 0.940 | 0.64 (0.33, 1.24) | 0.99 (0.65, 1.49) | 0.662 | 1.17 (0.61, 2.25) |
| **SHBG** | 1.02 (0.73, 1.42) | 0.798 | 1.08 (0.76, 1.54) | 1.11 (0.84, 1.47) | 0.274 | 0.85 (0.57, 1.27) |
| **Progesterone** | 1.53 (1.09, 2.17) | 0.295 | 1.19 (0.86, 1.65) | 0.90 (0.61, 1.32) | 0.715 | 0.99 (0.66, 1.49) |
| **TSH** | 1.16 (0.85, 1.61) | 0.706 | 1.27 (0.92, 1.75) | 0.93 (0.60, 1.43) | 0.756 | 1.03 (0.63, 1.70) |
| **T3** | 0.89 (0.62, 1.27) | 0.794 | 0.83 (0.56, 1.23) | 0.82 (0.56, 1.20) | 0.844 | 0.87 (0.54, 1.39) |
| **fT4** | 1.05 (0.73, 1.52) | 0.727 | 0.96 (0.70, 1.33) | 0.82 (0.58, 1.15) | 0.951 | 0.80 (0.55, 1.18) |
| **T4** | 1.32 (0.94, 1.86) | 0.643 | 1.18 (0.83, 1.68) | 1.03 (0.74, 1.43) | 0.568 | 0.88 (0.59, 1.32) |
| **Testosterone** | 1.20 (0.73, 1.97) | 0.944 | 1.23 (0.72, 2.11) | 1.15 (0.66, 1.99) | 0.880 | 1.08 (0.58, 2.02) |
| **T3/T4** | 0.85 (0.58, 1.23) | 0.886 | 0.81 (0.55, 1.20) | 0.84 (0.59, 1.18) | 0.597 | 0.98 (0.61, 1.56) |
| **Prog/E3** | 1.77 (1.29, 2.44) | 0.537 | 1.53 (1.07, 2.17) | 0.97 (0.72, 1.32) | 0.772 | 0.91 (0.62, 1.33) |
|  | **Preeclampsia** | | | **Gestational Diabetes** | | |
|  | **18 weeks** | **Int P** | **26 weeks** | **18 weeks** | **Int P** | **26 weeks** |
|  | **OR (95% CI)** | **OR (95% CI)** | **OR (95% CI)** | **OR (95% CI)** |
| **CRH** | 0.75 (0.38, 1.48) | 0.871 | 0.69 (0.29, 1.63) | 1.96 (0.75, 5.09) | 0.953 | 2.04 (0.62, 6.72) |
| **Estriol** | 0.57 (0.25, 1.31) | 0.604 | 0.42 (0.17, 0.99) | 1.81 (0.73, 4.45) | 0.184 | 5.95 (1.27, 27.8) |
| **SHBG** | 0.55 (0.30, 0.99) | 0.638 | 0.46 (0.25, 0.83) | 0.79 (0.45, 1.38) | 0.137 | 1.96 (0.67, 5.72) |
| **Progesterone** | 0.83 (0.28, 2.47) | 0.593 | 1.20 (0.54, 2.66) | 1.28 (0.50, 3.29) | 0.324 | 2.71 (0.80, 9.12) |
| **TSH** | 1.38 (0.70, 2.74) | 0.335 | 2.18 (1.19, 3.99) | 1.67 (1.02, 2.72) | 0.697 | 1.33 (0.47, 3.78) |
| **T3** | 0.72 (0.34, 1.50) | 0.807 | 0.83 (0.34, 2.04) | 2.83 (1.04, 7.68) | 0.335 | 1.61 (0.84, 3.09) |
| **fT4** | 0.88 (0.39, 1.99) | 0.372 | 0.52 (0.22, 1.18) | 0.90 (0.34, 2.35) | 0.486 | 1.64 (0.38, 7.20) |
| **T4** | 0.77 (0.32, 1.85) | 0.875 | 0.86 (0.29, 2.55) | 0.81 (0.32, 2.04) | 0.697 | 1.06 (0.37, 3.02) |
| **Testosterone** | 1.26 (0.52, 3.07) | 0.839 | 1.47 (0.43, 5.00) | 0.53 (0.18, 1.57) | 0.500 | 0.29 (0.06, 1.41) |
| **T3/T4** | 0.91 (0.43, 1.93) | 0.917 | 0.97 (0.42, 2.22) | 2.97 (1.20, 7.35) | 0.352 | 1.74 (0.82, 3.67) |
| **Prog/E3** | 1.32 (0.69, 2.54) | 0.514 | 1.78 (0.97, 3.28) | 0.77 (0.39, 1.54) | 0.566 | 1.08 (0.42, 2.75) |
| CRH, estriol, SHBG, progesterone, TSH, testosterone, and prog/E3 were natural log transformed for analyses.  Effect estimates refer to an interquartile range increase in hormone concentration.  Int P indicates significance of effect modification by study visit – i.e. the p-value for the interaction term between hormone concentration and study visit. | | | | | | |

| **Supplementary Table S3**. **Differential associations between birth outcomes and hormones measured at 18 and 26 weeks by fetal sex.** | | | | | |
| --- | --- | --- | --- | --- | --- |
|  | **Preterm Birth** | | | | |
|  | **Female pregnancies** | |  | **Male pregnancies** | |
|  | **18 weeks** | **26 weeks** |  | **18 weeks** | **26 weeks** |
|  | **OR (95% CI)** | **OR (95% CI)** | **Int P** | **OR (95% CI)** | **OR (95% CI)** |
| **CRH** | 0.68 (0.40, 1.15) | 0.64 (0.37, 1.13) | 0.002 | 1.82 (1.09, 3.05) | 1.73 (0.98, 3.05) |
| **Estriol** | 0.92 (0.56, 1.51) | 0.52 (0.25, 1.11) | 0.022 | 1.81 (1.07, 3.06) | 1.03 (0.53, 2.01) |
| **SHBG** | 0.72 (0.49, 1.07) | 0.60 (0.37, 0.96) | 0.032 | 1.22 (0.82, 1.83) | 1.01 (0.66, 1.55) |
| **Progesterone** | 0.95 (0.60, 1.52) | 0.74 (0.42, 1.30) | 0.011 | 1.88 (1.16, 3.04) | 1.46 (0.96, 2.23) |
| **TSH** | 0.90 (0.61, 1.32) | 1.24 (0.78, 1.97) | 0.397 | 1.10 (0.75, 1.60) | 1.52 (0.98, 2.36) |
| **T3** | 0.66 (0.41, 1.06) | 0.74 (0.42, 1.30) | 0.013 | 1.35 (0.86, 2.13) | 1.53 (0.95, 2.46) |
| **fT4** | 1.08 (0.71, 1.66) | 0.97 (0.59, 1.58) | 0.115 | 1.63 (1.06, 2.51) | 1.46 (0.93, 2.30) |
| **T4** | 1.13 (0.74, 1.71) | 1.06 (0.67, 1.67) | 0.397 | 1.39 (0.93, 2.08) | 1.31 (0.83, 2.08) |
| **Testosterone** | 2.21 (1.16, 4.23) | 2.15 (1.08, 4.27) | 0.000 | 0.52 (0.30, 0.89) | 0.50 (0.26, 0.96) |
| **T3/T4** | 0.66 (0.41, 1.04) | 0.71 (0.42, 1.19) | 0.032 | 1.18 (0.77, 1.81) | 1.27 (0.81, 1.99) |
| **Prog/E3** | 1.00 (0.67, 1.48) | 1.36 (0.85, 2.17) | 0.880 | 0.96 (0.67, 1.39) | 1.31 (0.84, 2.04) |
|  | **Spontaneous Preterm Birth** | | | | |
|  | **Female pregnancies** | |  | **Male pregnancies** | |
|  | **18 weeks** | **26 weeks** |  | **18 weeks** | **26 weeks** |
|  | **OR (95% CI)** | **OR (95% CI)** | **Int P** | **OR (95% CI)** | **OR (95% CI)** |
| **CRH** | 0.75 (0.38, 1.49) | 0.57 (0.27, 1.20) | 0.003 | 2.73 (1.38, 5.43) | 2.10 (0.96, 4.58) |
| **Estriol** | 1.22 (0.64, 2.33) | 1.35 (0.51, 3.57) | 0.340 | 1.73 (0.92, 3.25) | 1.92 (0.79, 4.64) |
| **SHBG** | 0.99 (0.58, 1.69) | 0.98 (0.51, 1.90) | 0.418 | 1.29 (0.78, 2.16) | 1.28 (0.71, 2.32) |
| **Progesterone** | 1.16 (0.65, 2.07) | 1.70 (0.85, 3.38) | 0.303 | 1.60 (0.89, 2.86) | 2.34 (1.36, 4.03) |
| **TSH** | 0.71 (0.46, 1.12) | 0.93 (0.50, 1.75) | 0.265 | 0.99 (0.63, 1.58) | 1.30 (0.73, 2.30) |
| **T3** | 0.78 (0.42, 1.43) | 0.79 (0.37, 1.69) | 0.013 | 2.01 (1.10, 3.65) | 2.05 (1.10, 3.84) |
| **fT4** | 1.48 (0.88, 2.52) | 1.55 (0.79, 3.03) | 0.577 | 1.79 (1.05, 3.07) | 1.87 (1.02, 3.42) |
| **T4** | 1.08 (0.63, 1.86) | 1.10 (0.60, 2.03) | 0.386 | 1.44 (0.87, 2.36) | 1.46 (0.79, 2.69) |
| **Testosterone** | 1.58 (0.69, 3.62) | 1.61 (0.64, 4.02) | 0.001 | 0.31 (0.15, 0.64) | 0.31 (0.13, 0.79) |
| **T3/T4** | 0.80 (0.45, 1.44) | 0.83 (0.41, 1.69) | 0.063 | 1.57 (0.91, 2.71) | 1.62 (0.90, 2.92) |
| **Prog/E3** | 0.85 (0.51, 1.41) | 1.65 (0.88, 3.09) | 0.979 | 0.86 (0.54, 1.36) | 1.67 (0.93, 3.00) |
|  | **Gestational Age at Birth** | | | | |
|  | **Female pregnancies** | |  | **Male pregnancies** | |
|  | **18 weeks** | **26 weeks** |  | **18 weeks** | **26 weeks** |
|  | **OR (95% CI)** | **OR (95% CI)** | **Int P** | **OR (95% CI)** | **OR (95% CI)** |
| **CRH** | -0.18 (-0.53, 0.16) | -0.10 (-0.46, 0.27) | 0.319 | -0.39 (-0.71, -0.06) | -0.30 (-0.66, 0.06) |
| **Estriol** | 0.01 (-0.32, 0.33) | 0.56 (0.11, 1.01) | 0.125 | -0.28 (-0.63, 0.07) | 0.28 (-0.17, 0.74) |
| **SHBG** | -0.12 (-0.39, 0.15) | -0.16 (-0.47, 0.15) | 0.510 | -0.01 (-0.28, 0.25) | -0.05 (-0.35, 0.24) |
| **Progesterone** | -0.30 (-0.61, 0.02) | 0.16 (-0.17, 0.49) | 0.015 | -0.70 (-1.01, -0.39) | -0.24 (-0.54, 0.06) |
| **TSH** | 0.07 (-0.18, 0.33) | -0.08 (-0.38, 0.21) | 0.914 | 0.06 (-0.20, 0.31) | -0.10 (-0.40, 0.19) |
| **T3** | -0.06 (-0.37, 0.26) | 0.12 (-0.24, 0.48) | 0.281 | -0.26 (-0.56, 0.04) | -0.08 (-0.41, 0.24) |
| **fT4** | -0.19 (-0.46, 0.08) | -0.01 (-0.33, 0.30) | 0.245 | -0.39 (-0.68, -0.10) | -0.21 (-0.51, 0.09) |
| **T4** | -0.15 (-0.42, 0.13) | -0.13 (-0.42, 0.17) | 0.653 | -0.22 (-0.50, 0.06) | -0.20 (-0.51, 0.11) |
| **Testosterone** | -0.07 (-0.47, 0.33) | -0.11 (-0.55, 0.32) | 0.121 | 0.29 (-0.09, 0.66) | 0.24 (-0.18, 0.66) |
| **T3/T4** | 0.01 (-0.29, 0.32) | 0.22 (-0.12, 0.56) | 0.260 | -0.19 (-0.48, 0.10) | 0.02 (-0.29, 0.33) |
| **Prog/E3** | -0.16 (-0.40, 0.09) | -0.23 (-0.53, 0.07) | 0.542 | -0.25 (-0.50, -0.01) | -0.32 (-0.61, -0.04) |
|  | **Birthweight Z-Score** | | | | |
|  | **Female pregnancies** | |  | **Male pregnancies** | |
|  | **18 weeks** | **26 weeks** |  | **18 weeks** | **26 weeks** |
|  | **OR (95% CI)** | **OR (95% CI)** | **Int P** | **OR (95% CI)** | **OR (95% CI)** |
| **CRH** | -0.01 (-0.17, 0.16) | 0.02 (-0.16, 0.19) | 0.763 | -0.04 (-0.20, 0.12) | -0.01 (-0.19, 0.16) |
| **Estriol** | 0.00 (-0.17, 0.16) | 0.11 (-0.11, 0.34) | 0.030 | 0.19 (0.02, 0.36) | 0.31 (0.08, 0.53) |
| **SHBG** | 0.05 (-0.08, 0.19) | -0.02 (-0.17, 0.13) | 0.646 | 0.02 (-0.11, 0.15) | -0.05 (-0.20, 0.09) |
| **Progesterone** | -0.14 (-0.30, 0.02) | -0.03 (-0.20, 0.13) | 0.505 | -0.09 (-0.24, 0.07) | 0.02 (-0.13, 0.17) |
| **TSH** | -0.03 (-0.16, 0.10) | -0.04 (-0.18, 0.11) | 0.495 | 0.02 (-0.10, 0.15) | 0.02 (-0.13, 0.16) |
| **T3** | -0.04 (-0.20, 0.11) | -0.01 (-0.18, 0.17) | 0.527 | 0.01 (-0.12, 0.15) | 0.05 (-0.11, 0.21) |
| **fT4** | -0.10 (-0.23, 0.04) | -0.06 (-0.22, 0.09) | 0.545 | -0.05 (-0.19, 0.10) | -0.01 (-0.16, 0.13) |
| **T4** | -0.12 (-0.26, 0.01) | -0.15 (-0.29, 0.00) | 0.279 | -0.03 (-0.17, 0.10) | -0.06 (-0.21, 0.09) |
| **Testosterone** | 0.14 (-0.05, 0.34) | 0.02 (-0.19, 0.24) | 0.299 | 0.02 (-0.16, 0.21) | -0.09 (-0.30, 0.11) |
| **T3/T4** | 0.00 (-0.14, 0.15) | 0.06 (-0.10, 0.23) | 0.993 | 0.00 (-0.13, 0.13) | 0.06 (-0.08, 0.21) |
| **Prog/E3** | -0.06 (-0.18, 0.06) | -0.05 (-0.20, 0.10) | 0.086 | -0.19 (-0.31, -0.07) | -0.18 (-0.33, -0.04) |
|  | **Small for Gestational Age** | | | | |
|  | **Female pregnancies** | |  | **Male pregnancies** | |
|  | **18 weeks** | **26 weeks** |  | **18 weeks** | **26 weeks** |
|  | **OR (95% CI)** | **OR (95% CI)** | **Int P** | **OR (95% CI)** | **OR (95% CI)** |
| **CRH** | 0.90 (0.53, 1.55) | 1.28 (0.75, 2.19) | 0.821 | 0.84 (0.51, 1.40) | 1.19 (0.70, 2.02) |
| **Estriol** | 0.76 (0.45, 1.30) | 0.76 (0.40, 1.45) | 0.216 | 0.55 (0.32, 0.94) | 0.54 (0.28, 1.05) |
| **SHBG** | 1.17 (0.76, 1.80) | 1.25 (0.81, 1.93) | 0.287 | 0.90 (0.60, 1.35) | 0.96 (0.64, 1.45) |
| **Progesterone** | 1.42 (0.87, 2.32) | 1.09 (0.67, 1.77) | 0.564 | 1.64 (1.00, 2.68) | 1.26 (0.83, 1.92) |
| **TSH** | 1.01 (0.66, 1.54) | 1.10 (0.71, 1.71) | 0.265 | 1.33 (0.88, 2.03) | 1.46 (0.95, 2.24) |
| **T3** | 1.03 (0.63, 1.70) | 0.98 (0.58, 1.66) | 0.344 | 0.79 (0.50, 1.25) | 0.75 (0.47, 1.18) |
| **fT4** | 1.17 (0.76, 1.80) | 1.10 (0.69, 1.76) | 0.383 | 0.93 (0.59, 1.48) | 0.87 (0.57, 1.34) |
| **T4** | 1.32 (0.85, 2.04) | 1.17 (0.76, 1.81) | 0.964 | 1.34 (0.87, 2.05) | 1.19 (0.76, 1.84) |
| **Testosterone** | 1.11 (0.59, 2.10) | 1.14 (0.60, 2.18) | 0.696 | 1.28 (0.70, 2.32) | 1.31 (0.71, 2.41) |
| **T3/T4** | 0.93 (0.57, 1.51) | 0.90 (0.55, 1.48) | 0.541 | 0.78 (0.50, 1.22) | 0.76 (0.49, 1.19) |
| **Prog/E3** | 1.39 (0.94, 2.06) | 1.15 (0.75, 1.76) | 0.022 | 2.39 (1.59, 3.60) | 1.98 (1.29, 3.05) |
|  | **Large for Gestational Age** | | | | |
|  | **Female pregnancies** | |  | **Male pregnancies** | |
|  | **18 weeks** | **26 weeks** |  | **18 weeks** | **26 weeks** |
|  | **OR (95% CI)** | **OR (95% CI)** | **Int P** | **OR (95% CI)** | **OR (95% CI)** |
| **CRH** | 0.81 (0.49, 1.34) | 0.96 (0.54, 1.69) | 0.936 | 0.83 (0.51, 1.36) | 0.98 (0.55, 1.74) |
| **Estriol** | 0.94 (0.58, 1.54) | 1.11 (0.53, 2.33) | 0.707 | 1.05 (0.62, 1.76) | 1.23 (0.59, 2.58) |
| **SHBG** | 1.22 (0.80, 1.84) | 0.94 (0.58, 1.52) | 0.488 | 1.02 (0.68, 1.52) | 0.79 (0.50, 1.24) |
| **Progesterone** | 0.91 (0.56, 1.48) | 1.01 (0.59, 1.73) | 0.898 | 0.88 (0.54, 1.42) | 0.98 (0.60, 1.61) |
| **TSH** | 0.80 (0.54, 1.20) | 0.89 (0.55, 1.44) | 0.265 | 1.06 (0.72, 1.58) | 1.18 (0.74, 1.89) |
| **T3** | 0.78 (0.49, 1.25) | 0.83 (0.47, 1.46) | 0.772 | 0.85 (0.55, 1.31) | 0.90 (0.54, 1.51) |
| **fT4** | 0.81 (0.53, 1.23) | 0.80 (0.48, 1.32) | 0.944 | 0.83 (0.53, 1.29) | 0.81 (0.50, 1.32) |
| **T4** | 0.97 (0.63, 1.47) | 0.83 (0.52, 1.34) | 0.635 | 1.09 (0.72, 1.65) | 0.94 (0.58, 1.53) |
| **Testosterone** | 1.40 (0.76, 2.59) | 1.32 (0.65, 2.65) | 0.306 | 0.97 (0.54, 1.72) | 0.91 (0.46, 1.79) |
| **T3/T4** | 0.78 (0.50, 1.24) | 0.92 (0.54, 1.55) | 0.682 | 0.88 (0.58, 1.33) | 1.03 (0.63, 1.66) |
| **Prog/E3** | 1.03 (0.71, 1.50) | 0.96 (0.59, 1.58) | 0.638 | 0.92 (0.63, 1.35) | 0.86 (0.53, 1.39) |
|  | **Preeclampsia** | | | | |
|  | **Female pregnancies** | |  | **Male pregnancies** | |
|  | **18 weeks** | **26 weeks** |  | **18 weeks** | **26 weeks** |
|  | **OR (95% CI)** | **OR (95% CI)** | **Int P** | **OR (95% CI)** | **OR (95% CI)** |
| **CRH** | 0.77 (0.30, 1.97) | 0.65 (0.25, 1.73) | 0.808 | 0.67 (0.24, 1.85) | 0.56 (0.19, 1.66) |
| **Estriol** | 0.68 (0.27, 1.70) | 0.38 (0.11, 1.31) | 0.669 | 0.87 (0.28, 2.66) | 0.48 (0.13, 1.71) |
| **SHBG** | 0.53 (0.27, 1.03) | 0.34 (0.14, 0.81) | 0.360 | 0.83 (0.35, 1.93) | 0.52 (0.21, 1.28) |
| **Progesterone** | 0.75 (0.32, 1.77) | 0.62 (0.23, 1.70) | 0.136 | 1.57 (0.61, 4.05) | 1.30 (0.59, 2.85) |
| **TSH** | 1.69 (0.82, 3.48) | 2.41 (1.11, 5.23) | 0.760 | 1.46 (0.62, 3.42) | 2.08 (0.82, 5.27) |
| **T3** | 0.67 (0.28, 1.62) | 0.75 (0.29, 1.95) | 0.742 | 0.80 (0.32, 2.01) | 0.90 (0.33, 2.43) |
| **fT4** | 0.71 (0.33, 1.54) | 0.40 (0.17, 0.92) | 0.730 | 0.84 (0.35, 2.04) | 0.47 (0.19, 1.16) |
| **T4** | 0.72 (0.32, 1.60) | 0.69 (0.30, 1.61) | 0.537 | 0.99 (0.41, 2.37) | 0.95 (0.36, 2.48) |
| **Testosterone** | 1.90 (0.58, 6.29) | 2.49 (0.72, 8.67) | 0.472 | 1.15 (0.35, 3.76) | 1.50 (0.39, 5.85) |
| **T3/T4** | 0.91 (0.39, 2.12) | 1.01 (0.41, 2.50) | 0.971 | 0.90 (0.38, 2.12) | 0.99 (0.40, 2.47) |
| **Prog/E3** | 1.02 (0.52, 2.02) | 1.25 (0.61, 2.53) | 0.232 | 1.74 (0.79, 3.84) | 2.12 (0.95, 4.71) |
|  | **Gestational Diabetes** | | | | |
|  | **Female pregnancies** | |  | **Male pregnancies** | |
|  | **18 weeks** | **26 weeks** |  | **18 weeks** | **26 weeks** |
|  | **OR (95% CI)** | **OR (95% CI)** | **Int P** | **OR (95% CI)** | **OR (95% CI)** |
| **CRH** | 0.92 (0.28, 3.01) | 1.15 (0.28, 4.67) | 0.122 | 3.08 (0.86, 11.10) | 3.86 (0.86, 17.27) |
| **Estriol** | 1.76 (0.54, 5.77) | 6.29 (1.41, 28.00) | 0.970 | 1.80 (0.58, 5.59) | 6.43 (1.26, 32.78) |
| **SHBG** | 0.62 (0.29, 1.34) | 1.51 (0.45, 5.07) | 0.429 | 0.95 (0.37, 2.46) | 2.32 (0.76, 7.12) |
| **Progesterone** | 0.74 (0.28, 1.96) | 1.51 (0.46, 4.92) | 0.081 | 1.89 (0.66, 5.42) | 3.83 (1.54, 9.57) |
| **TSH** | 1.18 (0.47, 2.94) | 0.84 (0.29, 2.43) | 0.179 | 2.58 (0.98, 6.81) | 1.84 (0.72, 4.69) |
| **T3** | 1.22 (0.36, 4.20) | 0.57 (0.16, 2.02) | 0.028 | 6.04 (1.72, 21.26) | 2.80 (0.98, 7.98) |
| **fT4** | 0.29 (0.10, 0.85) | 0.54 (0.17, 1.71) | 0.001 | 2.62 (0.96, 7.15) | 4.87 (1.53, 15.52) |
| **T4** | 0.32 (0.11, 0.90) | 0.40 (0.14, 1.18) | 0.002 | 2.42 (0.89, 6.57) | 3.05 (1.02, 9.13) |
| **Testosterone** | 1.74 (0.41, 7.32) | 0.81 (0.16, 4.18) | 0.025 | 0.26 (0.08, 0.90) | 0.12 (0.02, 0.61) |
| **T3/T4** | 2.63 (0.79, 8.76) | 1.69 (0.45, 6.36) | 0.972 | 2.70 (0.88, 8.24) | 1.73 (0.61, 4.92) |
| **Prog/E3** | 0.25 (0.09, 0.71) | 0.48 (0.16, 1.44) | 0.004 | 1.53 (0.65, 3.58) | 2.93 (0.99, 8.69) |
| CRH, estriol, SHBG, progesterone, TSH, testosterone, and prog/E3 were natural log transformed for analyses.  Effect estimates refer to an interquartile range increase in hormone concentration.  Int P indicates significance of effect modification by fetal sex – i.e. the p-value for the interaction term between hormone concentration and fetal sex indicator. | | | | | |
